# FastqCleaner: an interactive Bioconductor application for quality-control, filtering and trimming of FASTQ files

Leandro Gabriel Roser<sup>\*1</sup>, Fernán Agüero<sup>1</sup> and Daniel Oscar Sánchez<sup>\*1</sup>

## Abstract

## Background

Exploration and processing of FASTQ files are the first steps in state-of-the-art data analysis workflows of Next Generation Sequencing (NGS) platforms. The large amount of data generated by these technologies has put a challenge in terms of rapid analysis and visualization of sequencing information. Recent integration of the R data analysis platform with web visual frameworks has stimulated the development of user-friendly, powerful, and dynamic NGS data analysis applications.

## Results

This paper presents *FastqCleaner*, a Bioconductor visual application for both quality-control (QC) and pre-processing of FASTQ files. The interface shows diagnostic information for the input and output data and allows to select a series of filtering and trimming operations in an interactive framework. *FastqCleaner* combines the technology of Bioconductor for NGS data analysis with the data visualization advantages of a web environment.

## Conclusions

---

<sup>1</sup> Instituto de Investigaciones Biotecnológicas, Universidad Nacional de San Martín, CONICET, IIB-INTECH, 25 de Mayo y Francia, Buenos Aires, Argentina

\* Correspondence: [learoser@gmail.com](mailto:learoser@gmail.com), [dsanchez21@gmail.com](mailto:dsanchez21@gmail.com)

20 *FastqCleaner* is an user-friendly, offline-capable tool that enables access to advanced Bioconductor  
21 infrastructure. The novel concept of a Bioconductor interactive application that can be used without the  
22 need for programming skills, makes *FastqCleaner* a valuable resource for NGS data analysis.

23

## 24 **Keywords**

25 Bioconductor, FASTQ, Next generation sequencing, R, Shiny, User-friendly tool, Visualization, Web  
26 app

27

## 28 **Background**

29 The advent of Next Generation Sequencing (NGS) technologies has revolutionized genomics,  
30 transcriptomics and epigenomics research [1, 2]. The large amount of genetic information produced by  
31 these instruments requires suitable data handling and exploration methods. For most common  
32 platforms, FASTQ files are the raw starting material for subsequent analyses. A portion of the reads can  
33 include adapters or contaminants, the quality of the sequences becomes generally lower towards the  
34 end of the reads, and ambiguous base calls may be present. The correction of these and other artifacts  
35 are important steps that should be performed before using sequencing reads for mapping or assembly.

36 Bioconductor [3] is a widely used repository based on the R [4] programming language,  
37 containing tools devoted to the analysis of high-throughput genomic data. The massive use of these  
38 tools is, however, limited by the learning curve that users need to go through to work with customized  
39 code routines. Recently, R integration with web tools, in particular JavaScript APIs, has dramatically  
40 increased the potential of R to produce more interactive and dynamic experiences of data analysis. This  
41 integration is promissory to promote the adoption of R by many researchers for whom learning a  
42 programming language has proven to be a prohibitive investment of time and effort.

43 Here we present *FastqCleaner*, an R package with an offline-capable web application for QC,  
44 trimming and filtering of FASTQ files. The tool combines Bioconductor libraries for data analysis and  
45 the dynamism of a web application for data visualization.

46

## 47 **Implementation**

### 48 **Application overview**

49 *FastqCleaner* offers the following features:

- 50 1) Implementation of a local, offline-capable and user-friendly web interface
- 51 2) Processing of Single-Read (SR) and Paired-End (PE) files
- 52 3) Dynamic analysis of the input and output files, for customizable sampling size of reads
- 53 4) Interactive, dynamical exploration and visualization of the data, using cutting-edge technology based  
54 on JavaScript and CSS3
- 55 5) Cross-platform (running in Linux, Mac-OSX and Windows)
- 56 6) Open source, under GNU GPL ( $\geq 2$ ) license

57

### 58 **Program architecture**

59 *FastqCleaner* was developed in R and is distributed as an R package. Data processing is controlled via  
60 R functions, that can be also accessed as normal functions from the R console (Additional file 1). These  
61 programs make extensive use of the Bioconductor packages *IRanges* [5], *Biostrings* [6] and *ShortRead*  
62 [7]. For speed improvement of the routines, C++ code was implemented in R using the *Rcpp* API [8].  
63 The web interface included in the package was developed with *Shiny* [9], using JavaScript code written  
64 via the *jQuery* API, and CSS3.

65

## 66 **Design**

67 *FastqCleaner* takes compressed or uncompressed SR or PE files as input (Fig. 1). It accepts files with  
68 qualities in both Phred+33 and Phred+64 encoding, detecting Sanger, Solexa and Illumina 1.3+, 1.5+,  
69 and > 1.8+ formats. Input files can be processed through a set of independent filters based on either one  
70 of the following two principles: 1) *Remotion of a subset of reads that do not meet a given criterion*.  
71 This group of filters can remove: a) reads with unknown bases (Ns), b) low complexity sequences, c)  
72 duplicated reads, d) reads with length below a threshold quality value, and e) reads with an average  
73 quality below a threshold value. 2) *Trimming of individual reads*. This group of filters can trim: a) full  
74 and partial adapters, b) 5' regions below a predefined quality threshold, and c) 3' or 5' regions for a  
75 fixed nucleotide length. The adapter trimming algorithm extends the methodology of the  
76 *trimLRPatterns* function of *Biostrings*, designed to trim on the flanks of reads. For this purpose,  
77 *FastqCleaner* includes the *adapter\_filter* function, a wrapper of *Biostrings* matching tools. The  
78 function is able to trim both adapters present on the flanks or within reads (Fig. 2). Several parameters  
79 can be passed to modify the behavior of the tool. These parameters allow, for example, to select a  
80 different threshold for the number of mismatches, to take into account the presence of indels, etc.

81 For SR files, *FastqCleaner* sequentially processes a block of reads and writes the resulting post-  
82 processed block into the corresponding output file. For PE files, the program uses in each cycle a two-  
83 step procedure: first, a block of forward and another of reverse reads are separately processed as in the  
84 SR case, and then only those reads present in both post-processed blocks are written into the  
85 corresponding output files.

86

## 87 **Availability**

88 The application and a tutorial are available in Bioconductor at

89 <http://bioconductor.org/packages/FastqCleaner/>

90

## 91 **Installation**

92 The application can be installed following the instructions detailed at <http://bioconductor.org/packages/>  
93 *FastqCleaner*/

94

## 95 **Launching the application**

96 The application can be launched with the following commands in the R console:

```
97 > library("FastqCleaner")
```

```
98 > launch_fqc()
```

99

100 Optionally, when the application is used in RStudio (versions 0.99.878 or higher), a button that allows  
101 the direct launch of the application with a single click can be found in the addins menu (Fig. 3).

102

## 103 **Results and Discussion**

104 The web interface with its three main tabs is described in Fig. 4. The first tab (Fig. 4A) shows the file-  
105 selection menu, the available filters, and the run/reset buttons. The selection of files and filters  
106 represents the starting point in the *FastqCleaner* workflow. The second tab (Fig. 4B) shows the  
107 sequential operations performed on reads after processing. This information consists in the names of  
108 the input and output files, and a summary of informative statistics of the reads that passed the filter. The  
109 third tab (Figs. 4C, D) shows tables and interactive plots for data diagnostic. Plots can be constructed  
110 for both input (original data) and output (post-processed) files. A table with the most frequent k-mers  
111 can also be visualized.

112 A comparison of the package with other applications is shown in Table 1. Benchmarking results  
113 indicated an excellent performance of *FastqCleaner* in comparison with other pre-processing tools in

114 terms of elapsed time. Analysis of SR pre-processing (Fig. 5) showed that these tools can be divided  
115 into three groups, in function of significant differences observed in processing speed for routine  
116 operations (Tukey HSD test,  $p < 0.001$  for all the three pairwise comparisons). The slowest were  
117 *cutadapt* and *FASTX-Toolkit* (group 1), while *AdapterRemoval* and *Trimmomatic* (group 2) were the  
118 fastest. *FastqCleaner* showed an intermediate performance, comparable to *Skewer* and *FLEXBAR*  
119 (group 3). In PE mode, benchmarking of PE pre-processing operations (Fig. 6) showed that  
120 *FastqCleaner* significantly outperforms all other tools for routine operations (Tukey HSD test,  $p <$   
121  $0.001$  for pairwise comparisons of *FastqCleaner* vs other individual applications).

122

## 123 **Conclusions**

124 *FastqCleaner* is a tool with a rich and interactive cutting-edge graphical interface for pre-processing  
125 and exploration of SR and PE FASTQ files. Comparison with other available programs in a typical pre-  
126 processing scenario of adapter trimming and length filtering, showed an excellent performance of the  
127 application for both SR and PE real datasets. The application is made available as an open source  
128 license. Coding experience is not required for its use, and is therefore particularly useful for users who  
129 are unfamiliar with R programming. Furthermore, all processing happens locally in the user's computer  
130 (even if the computer is disconnected from the network), making *FastqCleaner* amenable to run in  
131 environments where data confidentiality prevents uploading of files to the cloud.

132 In essence, *FastqCleaner's* dual capability facilitates both access to the underlying state-of-art  
133 Bioconductor infrastructure and to dynamic graphical visualizations in a 100% client-side friendly web  
134 environment. This makes *FastqCleaner* a novel technological advance for the analysis of Next  
135 Generation Sequencing data.

136

## 137 **Methods**

138 In order to assess the performance of *FastqCleaner*, we have compared the package with other  
139 available pre-processing tools in benchmark tests: *AdapterRemoval* 2.2.2 [10], *cutadapt* 1.14 [11],  
140 *FASTX-Toolkit* 0.0.13 [12], *FLEXBAR* 3.0.3 [13], *Skewer* 0.2.2 [14] and *Trimmomatic* 0.36 [15]. The  
141 tests (Additional file 2) were conducted for adapter removal and length filtering using SR and PE files,  
142 with 22 replicates of each tests for statistical analysis of performance. Processing conditions were  
143 standardized by disabling compression of output files and using a single thread. In addition, pre-  
144 processing in *FastqCleaner* was performed using a chunk size of 10,000 reads per cycle. For SR  
145 processing, we downloaded from SRA the dataset SRR014966, with 14.3 M reads of 36 bp. For PE  
146 processing, we downloaded the dataset SRR330569 with 27 M reads of 101 bp. Benchmark tests were  
147 conducted in R using a laptop with Linux, a 2.20GHz Intel Core i7 CPU and 16GB of 1600MHz RAM  
148 (Additional file 2).

149

## 150 **Additional files**

151 Additional file 1: PDF version of the online tutorial.

152 Additional file 2: R script used in this work for benchmark testing.

153 Additional file 3: Source code of *FastqCleaner* (zip file)

154

## 155 **List of abbreviations**

156 NGS: Next Generation Sequencing

157 SR: Single-Reads

158 PE: Paired-End Reads

159

## 160 **Availability and requirements**

161 **Project name:** FastqCleaner

162 **Project home page:** <http://bioconductor.org/packages/FastqCleaner/>

163 **Operating system(s):** Platform independent

164 **Programming language:** R, C++, HTML, JavaScript, CSS3

165 **License:** GNU GPL ( $\geq 2$ )

166

## 167 **Declarations**

### 168 **Ethics approval and consent to participate**

169 Not applicable.

170

### 171 **Consent for publication**

172 Not applicable.

173

### 174 **Availability of data and materials**

175 *FastqCleaner* is freely available from its Bioconductor home page at <http://bioconductor.org/packages/>

176 *FastqCleaner/* under a GNU GPL ( $\geq 2$ ) license. *FastqCleaner* can be launched on any system that has

177 R installed. An online tutorial is available at the package home page. A PDF version of this tutorial is

178 included as supplemental material (Additional file 1).

179

### 180 **Competing interests**



181 The authors declare that they have no competing interests.

182

### 183 **Funding**

184 *Funding*: National Agency for the Promotion of Science and Technology, (ANPCyT, Argentina. PICT-  
185 2014-0879 to DOS).

186

### 187 **Authors' contributions**

188 LGR designed and developed the R package. FA contributed to the improvement of the original design.

189 LGR, FA and DOS wrote the manuscript and tested the package. DOS and FA supervised the project.

190 All authors read and approved the final manuscript.

191

### 192 **Acknowledgements**

193 FA and DOS are Career Investigators from CONICET (Consejo Nacional de Investigaciones  
194 Científicas y Técnicas, Argentina).

195

### 196 **Captions to Figures**

197 **Fig. 1** Graphical representation of a typical workflow with *FastqCleaner*, showing the initial selection  
198 of FASTQ file(s), processing, and generation of output(s). Diagnostic interactive plots can be  
199 constructed for both input and output files. Circular arrows indicate halfway points in the workflow,  
200 where different configurations can be selected to re-run the program from there.

201

202 **Fig. 2** Examples for adapter trimming. Pictures show the relative position of an adapter and a read, and  
203 the expected result after processing with the *adapter\_filter* function of *FastqCleaner*. Dotted lines  
204 indicate the portion of the read that will be removed. Arrows show the direction along the read used for

205 the program to seek for matches. If one or more matches are found, the function trims the longest  
206 subsequence, that contains the matching region plus the rest of the read, in the corresponding trimming  
207 direction. *A*: partial adapter on the right + right-trimming of anchored adapter. *B*: partial adapter on the  
208 left + left-trimming of anchored adapter. *C*: partial adapter within read + right-trimming. *D,E*: full  
209 match between an adapter and a portion of the read + left- (*D*) or right- (*E*) trimming. *F*: multiple  
210 matches for a same adapter + left-trimming.

211

212 **Fig. 3** RStudio addins menu, showing the button to launch the *FastqCleaner* application.

213

214 **Fig. 4** Web interface of the *FastqCleaner* application. *A*: first tab, showing an example where a file and  
215 a filter are selected. *B*: second tab, showing the processes performed after running the program. *C*: third  
216 tab, showing the analysis of the data, in this case for the input FASTQ file. The plot shows the base  
217 composition of the sequences. *D*: fourth tab, showing a table with the frequency and the sequence of  
218 each duplicated read.

219

220 **Fig. 5** Boxplots for elapsed time (in seconds) for SR adapter trimming and read length filtering.

221

222 **Fig. 6** Boxplots for elapsed time (in seconds) for PE adapter trimming and read length filtering.

223 FASTX-Toolkit is not capable to pre-process PE reads, and hence it is not shown in the plot.

224

## 225 **References**

226 1. Koboldt D, Steinberg K, Larson D, Wilson R, Mardis E. The next-generation sequencing revolution  
227 and its impact on genomics. *Cell* 2013; 155: 27–38.

228

229 2. Tripathi R, Sharma P, Chakraborty P, Varadwaj P. Next-generation sequencing revolution through big  
230 data analytics. *Front Life Sci.* 2016; 9: 119–149.

231

232 3. Huber W, Carey V, Gentleman R, Anders S, Carlson M, Carvalho B, Bravo H, Davis S, Gatto L,  
233 Girke T, Gottardo R. Orchestrating high-throughput genomic analysis with Bioconductor. *Nat Methods.*  
234 2015; 12: 115–121.

235

236 4. R Core Team. R: A Language and Environment for Statistical Computing. R Foundation for  
237 Statistical Computing, Vienna, Austria. 2017.

238

239 5. Lawrence M, Huber W, Pages H, Aboyoun P, Carlson M, Gentleman R, Morgan M, Carey V.  
240 Software for Computing and Annotating Genomic Ranges. *PLoS Comput Biol.* 2013; 9:e1003118.

241

242 6. Pagès H, Aboyoun P, Gentleman R and DebRoy S. Biostrings: String objects representing biological  
243 sequences, and matching algorithms. R package version 2.44.2. 2017.

244

245 7. Morgan M, Anders S, Lawrence M, Aboyoun P, Pages H, Gentleman R. ShortRead: a Bioconductor  
246 package for input, quality assessment and exploration of high-throughput sequence data.  
247 *Bioinformatics* 2009; 25: 2607–2608.

248

249 8. Eddelbuettel D, Romain F, Allaire J, Chambers J, Bates D, Ushey K. Rcpp: Seamless R and C++  
250 integration. *J Stat SoftW.* 2011; 40: 1-18.

251

- 252 9. Chang W, Cheng J, Allaire JJ, Xie Y, McPherson J. shiny: Web Application Framework for R. R  
253 package version 0.14.2. 2016. <https://CRAN.R-project.org/package=shiny>  
254
- 255 10. Schubert M, Stinus L, and Ludovic O. AdapterRemoval v2: rapid adapter trimming, identification,  
256 and read merging. BMC R Notes. 2016; 9: 88.  
257
- 258 11. Martin, M. (2011) Cutadapt removes adapter sequences from high-throughput sequencing reads.  
259 EMBnet journal. 2011; 17:10.  
260
- 261 12. Hannon G. FASTX Toolkit. [http://hannonlab.cshl.edu/fastx\\_toolkit/index.html](http://hannonlab.cshl.edu/fastx_toolkit/index.html). Accessed  
262 September 5 2017.  
263
- 264 13. Dodt M, Roehr J, Ahmed R, Dieterich C. FLEXBAR—flexible barcode and adapter processing for  
265 next-generation sequencing platforms. Biology 2012; 1: 895-905.  
266
- 267 14. Jiang H, Lei R, Ding SW, Zhu S. Skewer: a fast and accurate adapter trimmer for next-generation  
268 sequencing paired-end reads. BMC bioinformatics 2014; 15: 182.  
269
- 270 15. Bolger A, Lohse M, Usadel B. Trimmomatic: a flexible trimmer for Illumina sequence data.  
271 Bioinformatics 2014; 30: 2114-2120.

INPUT  
FASTQ  
FILE(S)

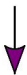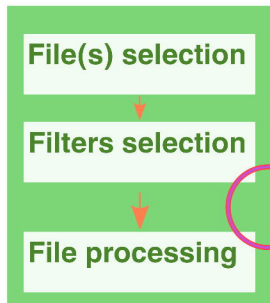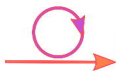

Diagnostic plots

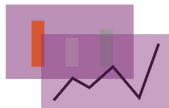

OUTPUT  
FASTQ  
FILE(S)

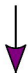

**A**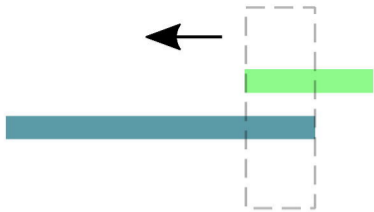**B**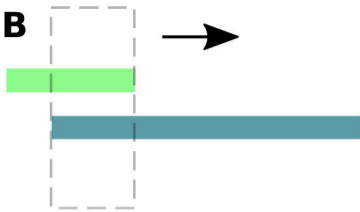**C**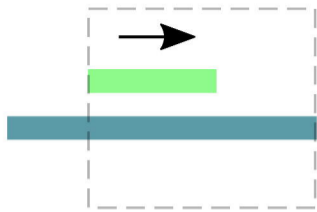**D**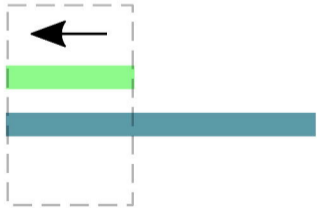**E**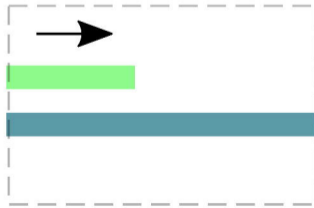**F**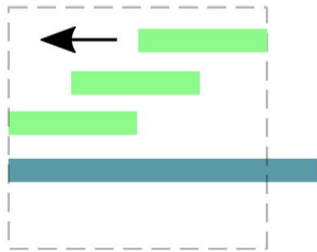

Project Explorer  
Package Explorer  
Source Explorer

```
1 |
```

- Run
- Run and Debug
- Run and Profile
- Run and Profile (with Coverage)
- Run and Profile (with Coverage) (with Memory Profiling)
- Run and Profile (with Coverage) (with Memory Profiling) (with Heap Dump)
- Run and Profile (with Coverage) (with Memory Profiling) (with Heap Dump) (with Network Profiling)
- Run and Profile (with Coverage) (with Memory Profiling) (with Heap Dump) (with Network Profiling) (with Thread Profiling)
- Run and Profile (with Coverage) (with Memory Profiling) (with Heap Dump) (with Network Profiling) (with Thread Profiling) (with CPU Profiling)
- Run and Profile (with Coverage) (with Memory Profiling) (with Heap Dump) (with Network Profiling) (with Thread Profiling) (with CPU Profiling) (with GPU Profiling)





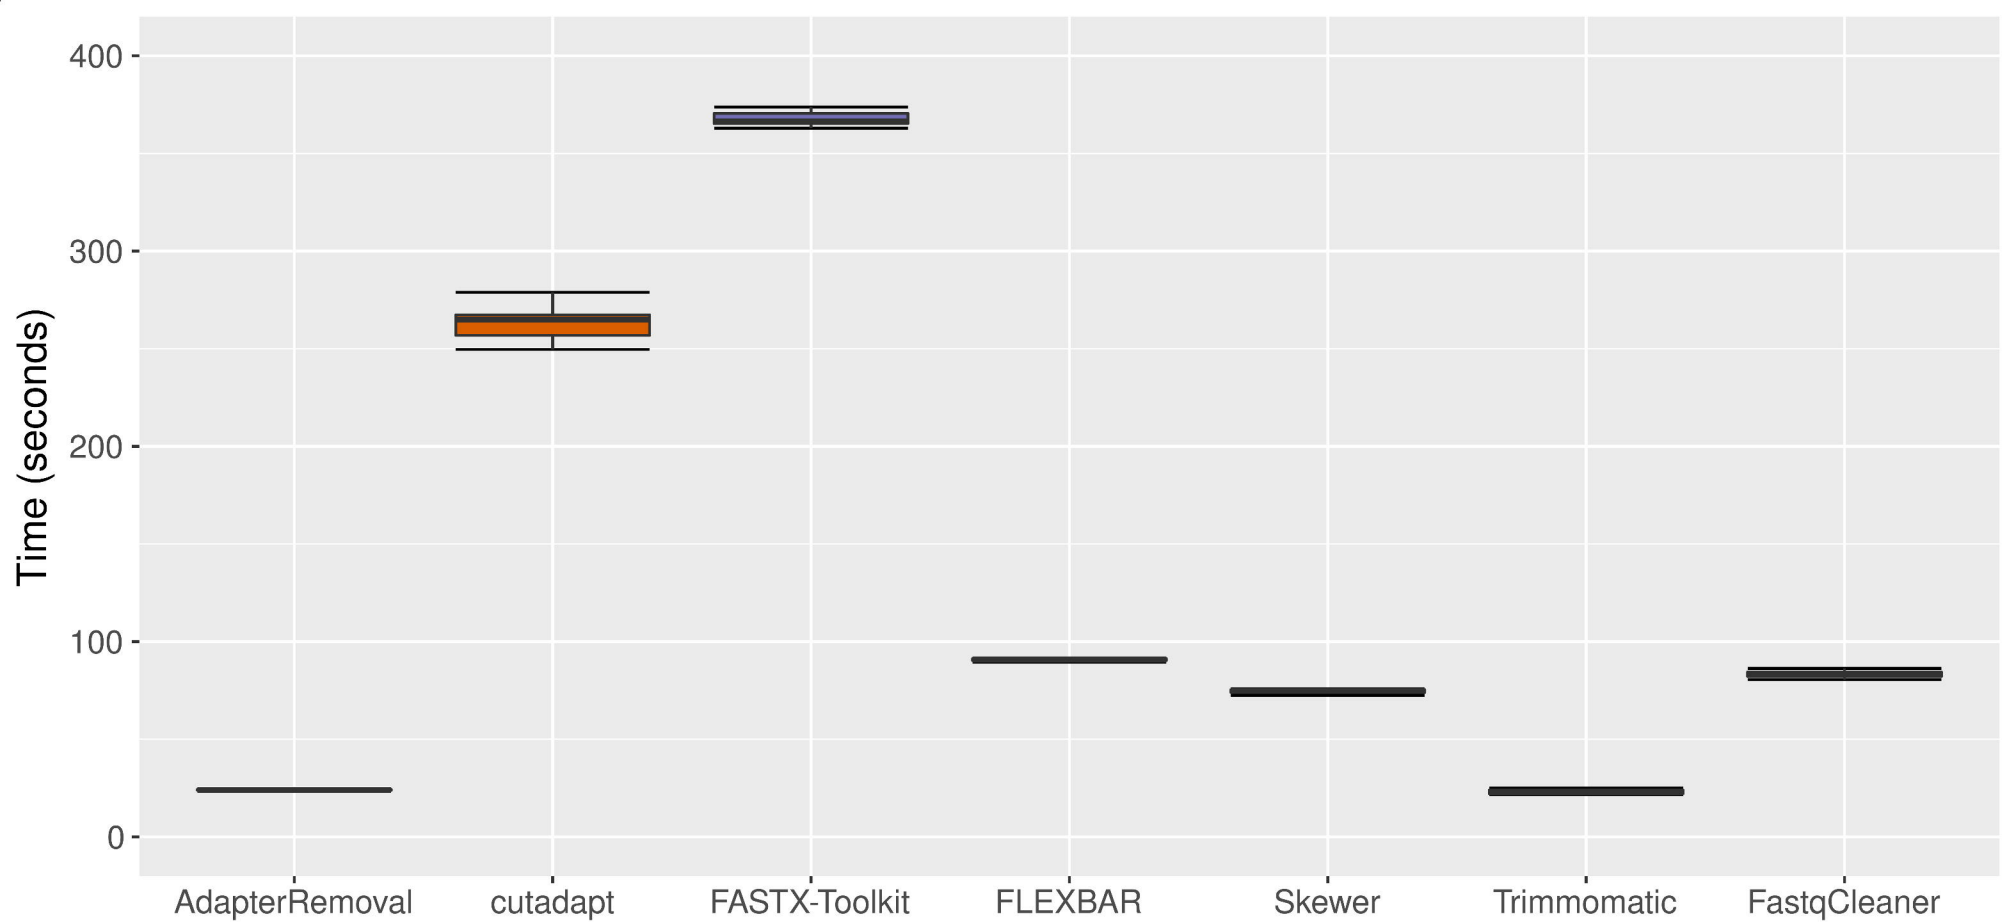

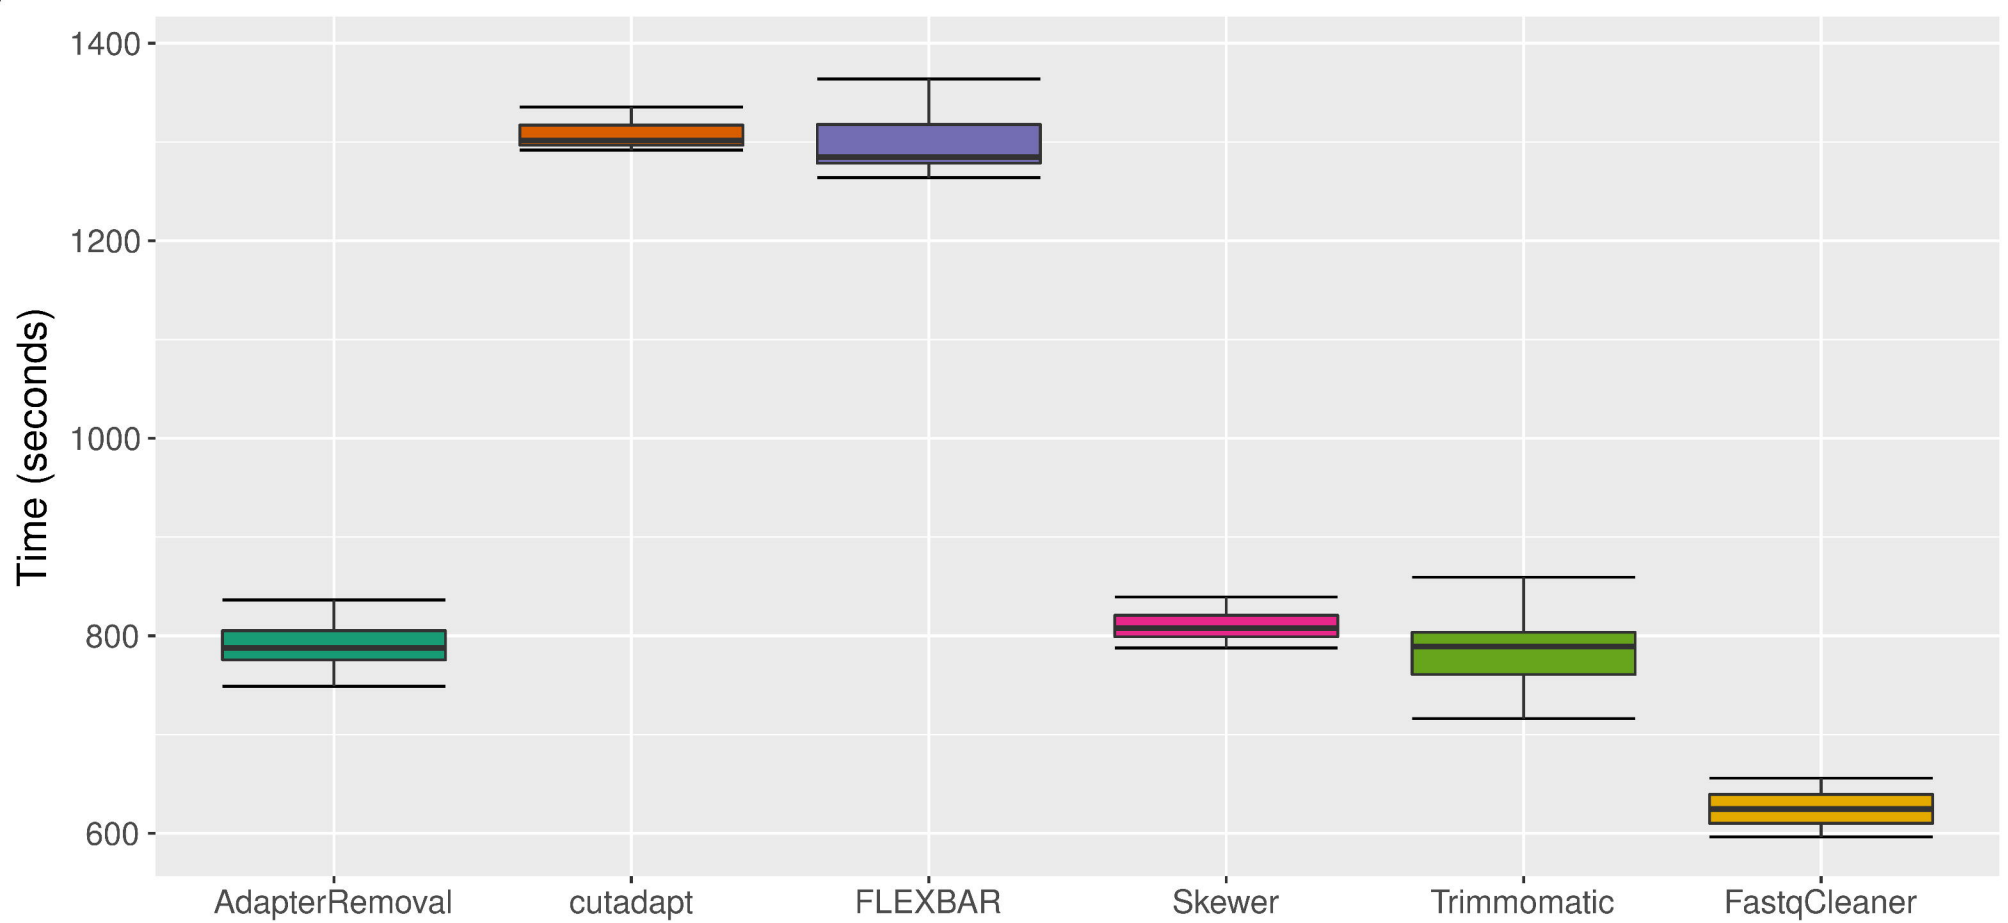

INPUT  
FASTQ  
FILE(S)



Diagnostic plots

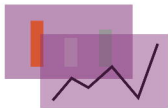

OUTPUT  
FASTQ  
FILE(S)

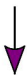

**A****B****C****D**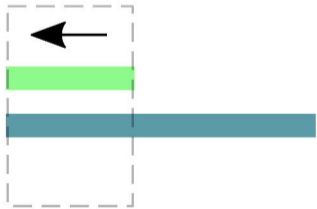**E**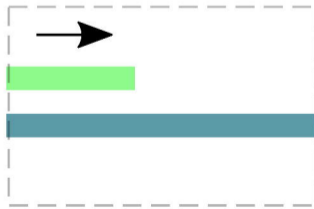**F**

Project Explorer

- src
- test
- resources

```
1
```

Run Configuration

Run

- Run
- Run and Debug
- Run with Profile
- Run with Profile and Debug
- Run with Profile and Debug and Monitor
- Run with Profile and Debug and Monitor and Profile

Run with Profile

Run with Profile and Debug

Run with Profile and Debug and Monitor

Run with Profile and Debug and Monitor and Profile



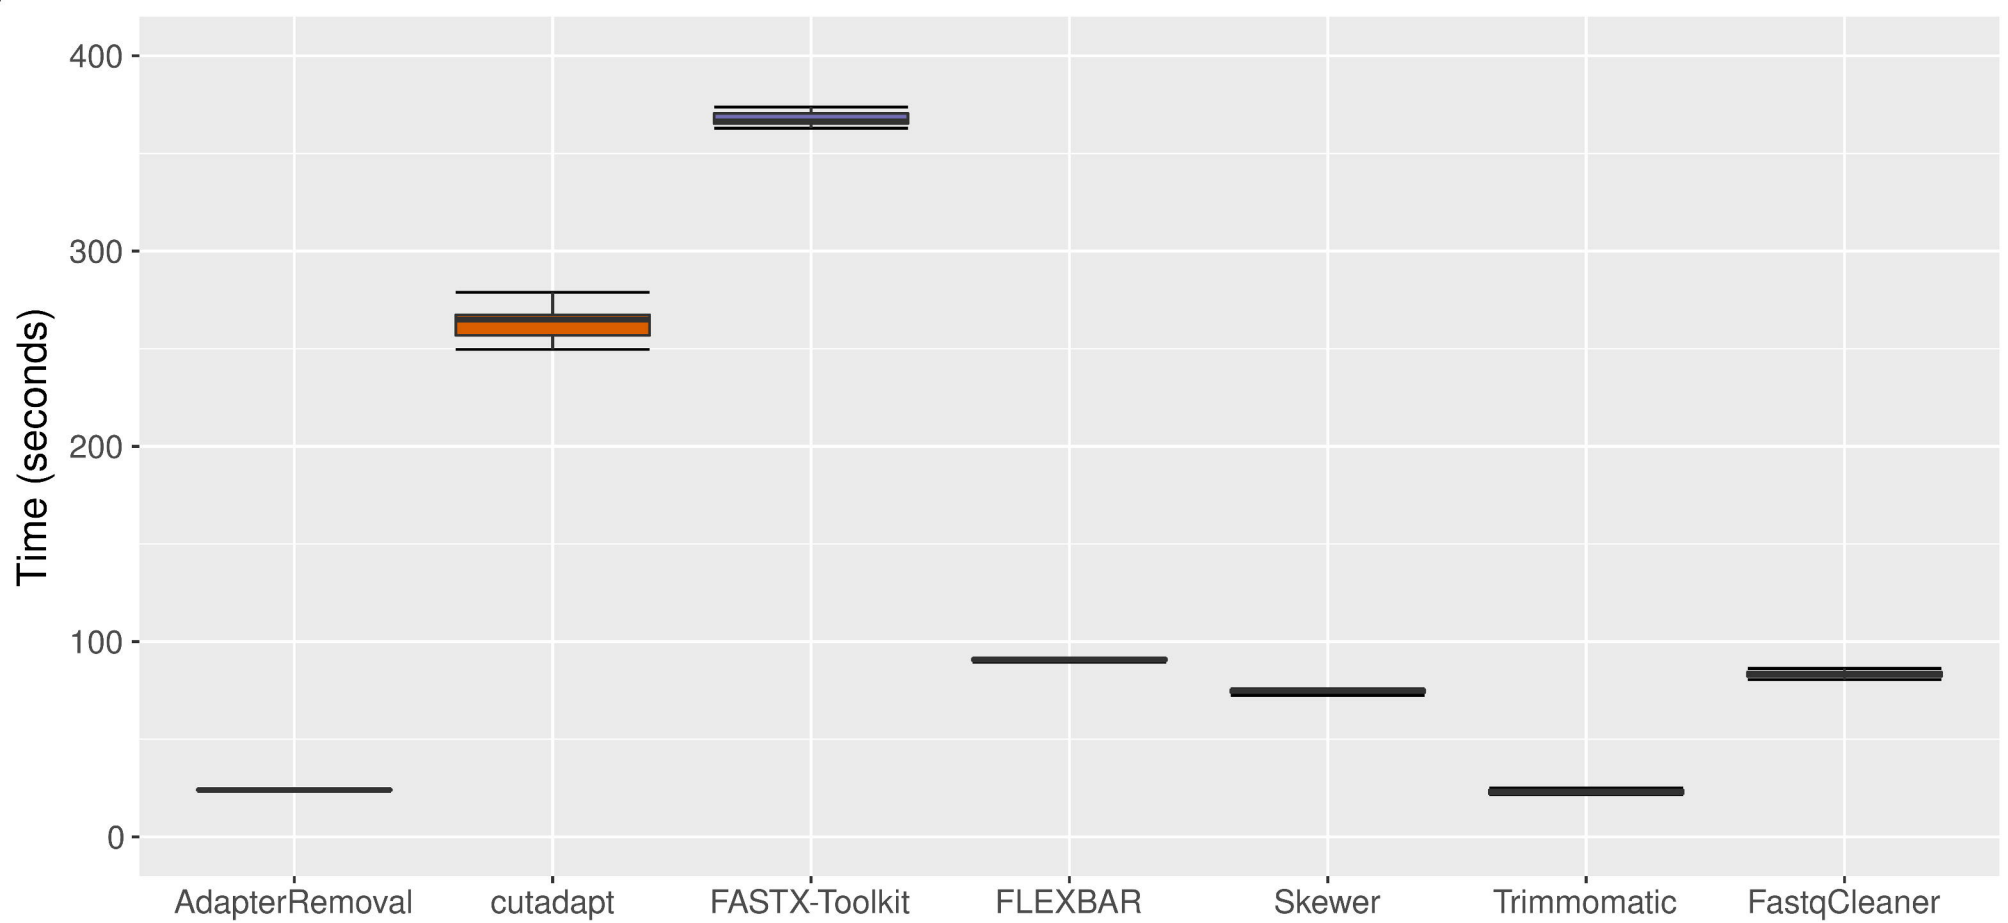



Source: https://www.biorxiv.org/content/10.1101/393140v3.full.pdf
